# Supplementary material for: Explaining the Linguistic Diversity of Sahul Using Population Models
Source: PLoS Biol. 2009 Nov 17;7(11):e1000241. doi: 10.1371/journal.pbio.1000241 (PMC2770058; doi:10.1371/journal.pbio.1000241)
Supplement: Dataset S1 — Coded language data. The complete data set used in this study. Numerals indicate character state, “?” indicates “unknown.” (0.04 MB TXT) [file pbio.1000241.s001.txt]

	1	2	3	4	5	6	7	8	9	10	11	12	13	14	15	16	17	18	19	20	21	22	23	24	25	26	27	28	29	30	31	32	33	34	35	36	37	38	39	40	41	42	43	44	45	46	47	48	49
	NstopEqNNas	NasVelStpSeq	Frics	PrenasStops	LRDist	PhonVelarFricOrGlide	VoiceContr	LaminalApical	RetroflexC	PhonConsLen	PhonVowelLength	CentralVContr	PhonStress	WeightSens	SyllPosSens	Tonal	WordFinalC	OnsetCClust	CodaCClust	DefSpecArt	IndefArticle	PrenomArt	PostnomArt	OrderNumN	OrderDem	DiscontNP	CoordComit	InclExclDist	MinAug	GenDist3rd	DualPronoun	12PronConfl	23PronConfl	PersCatNeut	3TermDems	VerticalDem	VisNonvisDem	DemClassifier	NumDecl	GenderDecl	SuppletiveN	SingMarkedN	DualMarkedN	PlMarkedN	LimitedNum	AssocPl	ActStateNmzr	AgentiveNmzr	ObjectNmzr
Onge	1	0	0	0	1	0	1	1	?	0	0	1	?	?	?	?	0	0	0	?	?	0	?	?	1	?	?	0	0	0	0	?	?	?	1	0	0	0	1	0	?	1	1	1	?	?	?	?	?
Tsou	1	0	1	0	0	1	1	0	0	0	0	1	0	0	1	0	0	1	0	1	1	0	0	?	2	0	0	1	0	0	0	0	0	0	1	0	1	0	0	0	0	0	0	0	0	?	1	1	1
Ilocano	1	0	1	0	1	1	1	0	0	1	0	1	1	1	1	0	1	0	1	1	0	1	0	1	1	0	1	1	0	0	1	0	0	0	1	0	1	0	0	0	0	0	0	0	0	0	1	1	1
Tagalog	1	0	1	0	1	?	1	0	0	0	1	0	1	1	1	0	1	0	0	1	0	1	0	1	3	0	1	1	0	0	1	0	0	0	1	0	0	0	0	0	0	0	0	0	0	0	1	1	1
Kimaragang	1	0	1	0	1	0	1	1	0	0	0	0	0	0	0	0	1	0	0	1	0	1	0	1	3	0	?	1	0	0	1	0	0	0	1	0	0	0	0	0	0	0	0	0	0	0	0	0	0
Sama	1	?	1	0	0	0	1	1	0	0	0	1	0	0	1	0	1	1	0	0	0	0	0	1	?	0	?	1	0	0	0	0	0	0	1	0	0	0	0	0	0	0	0	0	0	0	?	?	1
Belait	1	?	1	0	0	1	1	0	0	0	0	0	0	0	1	0	1	1	1	0	0	0	0	2	3	0	?	1	0	1	1	0	0	0	0	0	0	0	0	0	0	0	0	0	0	0	?	0	0
Muna	0	0	1	1	1	1	1	1	0	0	0	0	0	0	1	0	0	0	0	0	0	1	0	3	2	0	0	1	0	0	1	0	0	0	1	1	1	0	0	0	0	0	0	1	0	1	1	0	1
Taba	1	0	1	0	1	0	1	0	0	0	0	0	0	0	1	0	1	1	0	0	0	0	0	2	2	0	0	1	0	0	0	0	0	0	0	0	0	0	0	0	0	0	0	1	1	0	0	0	1
Biak	0	0	1	0	1	0	1	0	0	0	1	0	0	1	1	0	1	1	1	1	1	0	1	2	2	0	1	1	0	1	1	0	0	0	1	1	0	0	0	0	0	0	0	0	0	0	1	0	1
Wuvulu-Aua	?	?	1	0	0	1	1	?	?	0	0	?	0	?	?	?	0	?	?	1	?	?	?	?	?	?	?	1	?	0	?	0	0	?	?	0	?	0	0	0	?	0	0	0	0	?	?	?	?
Kele	?	?	1	1	1	0	1	?	?	0	0	?	1	?	?	?	1	?	?	0	?	?	?	?	?	?	?	1	?	0	?	0	0	?	?	0	?	0	0	0	0	0	0	0	0	?	?	?	?
Mussau	1	0	1	0	1	1	0	0	0	1	1	0	1	?	?	0	1	0	0	0	0	1	0	3	2	0	?	1	0	0	1	0	0	?	1	0	0	0	0	0	?	0	0	0	0	0	?	?	?
Manam	?	?	1	0	1	0	1	?	?	0	0	?	1	?	?	?	1	?	?	0	?	?	?	?	?	?	?	1	?	0	?	0	0	?	?	0	?	0	0	0	0	0	0	0	0	?	?	?	?
Takia	?	?	1	0	1	0	1	?	?	0	0	?	0	?	?	?	1	?	?	0	?	?	?	?	?	?	?	1	?	0	?	0	0	?	?	0	?	0	0	0	?	0	0	0	0	?	?	?	?
Yabem	?	?	1	1	0	?	1	?	?	0	0	?	0	?	?	?	1	?	?	0	?	?	?	?	?	?	?	1	?	0	?	0	0	?	?	0	?	0	?	0	?	0	0	1	1	?	?	?	?
Gapapaiwa	1	?	1	1	1	0	1	0	0	0	0	0	?	0	1	0	1	1	0	0	0	0	0	2	?	0	1	1	0	1	0	0	0	?	0	0	0	0	0	0	?	0	0	0	?	?	1	?	?
Sudest	?	?	1	1	1	1	1	?	?	0	1	?	0	?	?	?	1	?	?	0	?	?	?	?	?	?	?	1	?	0	?	1	0	?	?	0	?	0	0	0	1	0	0	1	1	?	?	?	?
Kilivila	?	?	1	0	1	0	1	?	?	0	0	?	1	?	?	?	1	?	?	0	?	?	?	?	?	?	?	1	?	0	?	0	0	?	?	0	?	1	0	0	0	0	0	1	1	?	?	?	?
Kove-Kaliai	?	?	1	1	1	1	1	?	?	0	0	?	0	?	?	?	1	?	?	0	?	?	?	?	?	?	?	1	?	0	?	0	0	?	?	0	?	0	0	0	1	0	0	0	0	?	?	?	?
Bali	1	0	1	1	1	1	0	0	0	0	0	0	0	0	1	0	0	0	0	?	?	1	0	2	2	0	0	1	0	0	1	0	0	?	1	0	0	0	0	0	?	0	0	1	0	?	1	?	?
Nakanai	?	?	1	0	1	0	1	?	?	0	0	?	0	?	?	?	0	?	?	0	?	?	?	?	?	?	?	1	?	0	?	0	0	?	?	0	?	0	0	0	0	0	0	0	0	?	?	?	?
Mangseng	?	?	1	0	1	0	1	?	?	0	0	?	0	?	?	?	1	?	?	0	?	?	?	?	?	?	?	1	?	0	?	0	0	?	?	1	?	0	0	0	?	0	0	0	?	?	?	?	?
Mengen	?	?	1	0	1	0	1	?	?	1	0	?	1	?	?	?	1	?	?	0	?	?	?	?	?	?	?	1	?	0	?	0	0	?	?	0	?	0	0	0	?	0	0	0	0	?	?	?	?
Meramera	?	?	1	0	0	0	1	?	?	0	0	?	0	?	?	?	0	?	?	0	?	?	?	?	?	?	?	1	?	0	?	0	0	?	?	0	?	0	0	0	0	0	0	0	?	?	?	?	?
Tolai	?	?	1	0	1	0	1	?	?	0	1	?	0	?	?	?	1	?	?	1	?	?	?	?	?	?	?	1	?	0	?	0	0	?	?	0	?	0	0	0	0	0	0	0	0	?	?	?	?
Duke_of_York	?	?	1	0	1	0	1	?	?	0	0	?	0	?	?	?	1	?	?	0	?	?	?	?	?	?	?	1	?	0	?	0	0	?	?	0	?	0	0	0	?	0	0	0	0	?	?	?	?
Siar	1	?	1	0	1	0	1	0	0	0	0	0	0	0	1	0	1	0	0	1	?	1	0	1	3	0	1	1	0	0	1	0	0	?	1	0	0	0	0	0	1	0	0	0	0	0	1	?	1
Madak	?	?	1	0	1	1	1	?	?	0	1	?	?	?	?	?	1	?	?	0	?	?	?	?	?	?	?	1	?	0	?	0	0	?	?	0	?	0	?	0	?	0	1	1	0	?	?	?	?
Tungag	?	?	1	0	1	0	1	?	?	0	1	?	?	?	?	?	1	?	?	0	?	?	?	?	?	?	?	1	?	0	?	0	0	?	?	0	?	0	0	0	1	0	0	0	0	?	?	?	?
Halia	?	?	1	0	1	0	1	?	?	0	1	?	?	?	?	?	1	?	?	0	?	?	?	?	?	?	?	1	?	0	?	1	0	?	?	0	?	0	0	0	0	0	0	0	?	?	?	?	?
Banoni	1	?	1	0	0	1	1	0	0	0	1	0	0	?	1	0	1	0	0	?	?	1	0	2	1	0	?	1	0	0	0	1	1	?	1	0	0	0	0	0	?	0	0	0	0	?	?	?	?
Sisiqa	0	0	1	1	1	1	1	0	0	0	0	1	0	0	1	0	?	?	0	1	?	0	1	1	2	0	?	1	0	0	0	0	0	?	1	0	0	0	0	0	?	0	0	0	0	?	?	?	?
Roviana	?	?	1	1	1	1	1	?	?	0	0	?	0	?	?	?	0	?	?	1	?	?	?	?	?	?	?	1	?	0	?	0	0	?	?	0	?	0	0	0	?	0	0	0	0	?	?	?	?
Kokota	1	0	1	0	1	1	1	0	0	0	0	0	0	?	1	0	0	1	0	1	0	1	0	1	2	0	?	1	0	1	0	0	0	?	1	0	1	0	0	0	?	0	0	0	0	?	?	?	?
Longgu	?	?	1	1	1	0	1	?	?	0	0	?	0	?	?	?	0	?	?	0	?	?	?	?	?	?	?	1	?	0	?	1	0	?	?	0	?	0	0	0	?	1	0	1	0	?	?	?	?
Rennellese	0	0	1	1	0	1	0	0	0	0	1	0	0	1	1	0	0	0	0	1	1	1	0	1	1	0	1	1	0	0	1	0	0	0	1	0	1	0	0	0	0	0	0	0	0	0	1	1	1
Aiwoo	?	?	1	1	0	0	1	?	?	0	1	?	?	?	?	?	0	?	?	0	?	?	?	?	?	?	?	1	?	0	?	0	0	?	?	0	?	0	0	0	0	0	0	1	1	?	?	?	?
Buma	1	0	1	1	1	1	0	1	0	0	1	0	0	1	1	0	0	0	0	0	0	0	0	2	2	0	?	1	0	0	1	1	0	0	1	0	0	0	0	0	?	0	0	0	0	?	0	0	0
Mwotlap	1	1	1	1	0	1	0	0	0	0	0	0	0	0	1	0	1	0	0	0	0	1	0	2	2	0	1	1	0	0	1	0	0	0	0	0	0	0	0	0	0	0	0	0	1	0	1	0	1
South_Efate	1	1	1	0	1	0	0	0	0	0	1	0	1	0	0	0	1	1	1	1	0	1	0	2	2	0	1	1	0	0	0	1	1	0	1	0	0	0	0	0	0	0	0	0	0	1	1	1	1
Sye	1	1	1	0	1	1	0	0	0	0	0	1	0	0	1	0	1	1	1	0	0	0	0	2	2	0	1	1	0	0	0	1	1	0	0	0	0	0	0	0	0	?	0	1	0	0	1	1	1
Iaai	1	?	1	0	1	1	1	1	1	0	1	1	0	0	1	0	1	0	0	1	?	1	0	1	2	0	?	1	0	0	0	0	0	0	1	0	0	0	0	0	0	0	0	0	0	?	?	?	?
Cemuhi	1	0	1	1	0	1	0	1	0	0	1	0	?	?	?	1	1	0	0	1	?	1	0	2	2	0	1	1	0	0	0	0	0	0	1	0	0	0	0	0	?	0	0	0	0	?	?	1	?
Xaracuu	1	0	1	1	0	1	0	1	0	0	1	1	0	0	1	0	0	0	0	1	0	1	0	1	2	0	1	1	0	0	1	0	0	0	1	0	1	0	0	0	0	0	0	0	0	0	1	1	1
Fijian	0	0	1	1	1	0	0	0	0	0	1	0	0	1	1	0	0	0	0	0	0	1	0	3	2	0	0	1	0	0	1	0	0	0	1	0	0	0	0	0	0	0	0	0	0	1	?	?	1
Rotuman	0	?	1	0	1	0	0	0	0	0	0	1	0	0	1	0	1	?	?	1	?	1	1	2	2	0	1	1	0	0	0	0	0	0	1	0	0	0	0	0	1	0	0	1	?	0	?	?	?
Marquesan,_North	0	0	1	0	0	0	0	0	0	0	1	0	0	1	1	0	0	0	0	1	0	1	0	1	3	0	0	1	0	0	0	0	0	0	1	0	0	0	0	0	0	0	0	1	0	?	1	?	?
Ulithian	0	?	1	0	1	1	0	1	0	0	1	1	0	1	0	0	1	0	1	0	0	0	0	1	2	0	?	1	0	0	0	1	0	0	1	0	0	0	0	0	?	0	0	0	0	0	0	1	0
Klon	0	0	1	0	1	0	1	1	0	0	1	0	1	1	1	?	1	0	0	?	0	0	?	2	2	0	0	1	0	0	1	0	1	0	?	?	?	0	0	0	?	0	0	0	0	1	0	1	1
Abui	0	0	1	0	1	0	1	0	0	0	1	0	1	1	1	1	1	0	0	1	0	0	1	2	3	0	1	1	0	0	0	0	0	0	1	1	0	0	0	0	0	0	0	0	0	1	0	0	0
Tidore	1	1	1	0	1	0	1	1	0	0	0	0	0	0	1	0	1	0	0	0	0	0	0	2	2	0	0	1	0	1	0	0	0	1	1	1	0	0	0	0	0	0	0	0	0	0	1	?	1
Tobelo	1	0	1	0	1	0	1	1	0	0	0	0	0	1	1	0	0	0	0	1	0	1	0	2	2	0	0	1	0	1	0	0	0	?	0	1	0	0	0	0	0	0	0	0	0	?	1	1	1
Meyah	0	0	1	0	0	0	1	1	0	0	0	0	1	0	0	1	1	1	1	0	0	0	0	2	2	0	0	1	0	0	1	0	1	0	1	1	0	0	0	0	0	0	0	0	0	0	0	0	0
Hatam	1	0	1	0	0	0	1	1	0	1	0	0	0	0	0	0	1	1	0	0	0	0	0	2	2	0	0	1	0	0	1	0	0	0	1	1	1	0	0	0	0	0	0	0	0	0	1	0	1
Mairasi	0	0	1	0	0	0	1	0	0	0	0	0	0	0	1	0	1	1	0	?	?	0	0	2	2	0	?	0	0	0	0	0	1	1	1	0	0	0	0	0	0	0	0	0	0	1	1	?	?
Bauzi	0	0	1	0	0	0	1	0	0	0	1	0	?	?	?	0	1	0	0	?	0	?	0	2	2	0	1	0	0	0	0	0	0	0	1	0	0	0	0	0	0	0	0	0	0	1	1	1	1
Orya	1	0	1	0	0	0	1	0	0	0	0	1	0	1	1	0	1	1	1	1	0	0	1	2	2	0	0	1	1	1	1	0	0	0	0	0	0	0	0	0	0	0	0	0	0	0	1	?	?
Isaka	0	0	1	0	0	0	1	0	0	0	0	0	1	0	0	1	1	1	0	0	0	0	0	2	2	0	1	0	0	1	1	0	1	1	0	0	0	0	0	0	0	0	0	0	0	0	0	0	0
Imonda	0	0	1	0	0	1	1	0	0	1	0	1	?	?	?	0	1	1	0	0	0	0	0	3	3	0	1	1	0	0	0	0	0	0	0	1	0	0	0	0	0	0	0	0	0	?	1	0	0
Menggwa_Dla	0	0	1	0	0	1	1	0	0	0	0	0	0	0	1	0	0	1	0	0	0	0	0	3	3	0	1	1	0	1	0	0	1	1	0	0	0	0	0	0	0	0	0	0	0	?	1	?	?
Abau	0	0	1	0	0	0	0	0	0	0	0	0	0	0	1	0	1	1	1	0	0	0	0	2	2	0	1	0	0	1	1	0	1	0	0	0	0	0	0	0	0	0	0	0	0	?	?	?	?
Namia	0	0	0	0	0	0	0	0	0	0	0	1	0	1	1	0	1	0	0	0	1	0	1	2	2	0	1	1	0	1	1	1	0	0	0	0	0	0	0	0	?	0	0	0	0	?	1	?	?
Mende	1	0	1	1	1	0	0	1	0	0	0	0	0	?	1	0	1	1	0	0	1	0	1	2	2	0	1	0	0	1	1	1	0	0	0	0	?	0	0	0	0	0	0	0	0	0	?	?	?
Bukiyip	0	0	1	0	1	0	1	1	0	0	0	1	0	0	1	0	1	1	1	0	0	0	0	3	1	0	1	0	0	1	1	0	0	0	0	0	0	0	1	1	?	1	0	1	0	?	?	?	?
Kamasau	1	0	1	1	0	1	1	1	0	0	0	1	0	1	1	0	1	1	0	0	0	0	0	2	2	0	1	0	0	1	0	0	0	0	0	0	0	0	0	0	0	0	0	0	0	0	?	?	?
Ambulas	1	0	1	1	0	0	0	1	0	0	0	1	0	0	1	0	1	0	0	0	0	0	0	2	1	0	1	0	0	1	1	1	1	?	0	0	0	0	0	0	0	0	0	0	0	1	1	?	?
Yessan-Mayo	0	0	1	1	1	0	0	0	0	0	0	1	0	1	1	0	1	0	?	0	0	0	0	2	1	0	0	0	0	1	1	0	?	?	1	1	0	0	0	0	0	0	0	0	0	1	?	?	?
Alamblak	1	0	1	0	0	1	1	0	0	0	0	1	0	1	1	0	1	1	1	1	0	1	0	1	1	?	1	0	0	1	1	1	?	?	0	0	0	0	0	0	?	1	1	1	?	?	1	?	?
Yimas	1	1	0	0	1	0	0	0	0	0	0	1	0	0	0	0	1	1	1	0	0	0	0	3	3	0	1	0	0	0	1	1	0	1	1	0	0	0	1	1	1	0	1	1	0	?	1	1	1
Kol	1	0	1	0	1	0	1	0	0	0	1	0	0	1	1	0	1	0	0	0	0	0	0	2	2	0	1	1	0	1	0	1	0	1	0	1	?	0	1	0	1	0	0	1	0	?	?	?	?
Sulka	1	0	1	0	1	0	1	0	0	1	1	0	1	0	1	0	1	1	0	1	1	1	0	2	2	0	1	0	0	0	1	0	0	0	0	1	0	0	1	0	1	0	0	1	0	?	1	1	1
Mali	1	0	1	0	1	1	1	0	0	0	0	1	0	0	0	0	1	1	0	1	0	1	0	2	2	0	1	0	0	1	?	1	1	0	0	0	0	1	0	0	0	1	1	1	1	1	0	1	1
Kuot	1	0	1	0	1	0	1	0	0	0	0	0	1	0	0	0	1	0	0	0	0	0	0	1	1	0	0	1	0	1	1	0	0	0	0	1	0	0	1	0	1	0	1	1	0	1	1	0	0
Rotokas	0	0	1	0	0	0	1	0	0	0	1	0	0	1	1	0	0	0	0	1	?	1	?	1	1	?	1	1	0	1	1	0	1	0	1	0	0	0	1	1	0	1	1	1	?	?	?	1	?
Motuna	?	?	1	0	0	0	0	?	?	0	0	?	0	?	?	?	1	?	?	1	?	?	?	?	?	?	?	1	?	0	?	0	0	?	?	0	?	0	0	0	?	0	1	1	0	?	?	?	?
Bilua	1	0	1	1	1	0	1	0	0	0	0	0	0	0	1	0	0	0	0	1	0	1	?	1	1	0	1	1	0	1	1	1	0	0	0	0	0	0	0	0	?	0	0	0	0	?	1	0	1
Lavukaleve	1	0	1	0	1	1	1	0	0	0	0	0	1	0	1	0	1	0	0	1	0	0	1	2	2	0	1	1	0	1	1	1	0	1	1	0	0	0	1	1	1	0	1	1	0	0	0	0	1
Yeli_Dnye	1	0	1	1	0	1	0	0	0	0	1	?	0	1	1	0	0	1	0	0	0	0	0	2	1	0	1	0	0	0	1	1	1	?	1	0	0	0	0	0	1	0	1	1	0	0	1	0	0
Inanwatan	0	0	1	0	0	0	1	0	0	0	0	0	1	0	0	0	0	0	0	0	0	0	0	2	2	0	1	1	0	1	0	0	0	0	0	0	0	0	0	0	1	0	0	1	?	?	1	1	0
Marind	0	0	1	1	0	0	1	0	0	0	0	0	0	0	1	0	1	0	0	0	0	0	0	3	3	0	1	0	0	1	0	0	1	0	1	0	0	0	0	0	1	0	0	0	0	?	?	1	1
Arammba	0	1	1	1	0	0	1	1	0	0	0	1	0	?	1	0	1	1	0	0	0	0	0	3	3	0	1	0	0	1	0	0	1	0	1	0	0	0	0	0	0	0	0	1	0	0	1	1	0
Bine	1	0	1	0	1	0	1	0	0	0	1	0	0	0	1	0	0	1	0	0	0	0	0	1	1	0	1	1	0	1	0	0	1	0	1	0	1	0	0	0	0	0	0	0	0	1	1	1	?
Gizrra	1	0	1	0	1	0	1	0	1	0	0	1	0	0	1	0	1	1	0	0	?	0	0	3	1	0	1	1	0	1	0	1	1	0	0	0	0	0	0	0	0	0	0	1	1	0	1	?	?
Meriam_Mir	0	0	1	0	1	0	1	0	0	0	0	0	1	0	0	0	1	1	1	1	0	1	0	1	1	0	1	1	0	0	0	1	0	0	0	0	0	0	0	0	0	0	1	1	0	0	1	1	0
Kiwai_Southern	0	0	1	0	0	0	1	0	0	0	0	0	?	?	?	?	0	0	0	0	0	0	0	3	1	0	1	0	0	0	1	0	1	0	0	0	0	0	0	0	0	0	0	0	0	?	1	0	?
Kamoro	0	0	0	0	0	0	0	0	0	0	1	0	1	0	0	1	0	0	0	0	0	0	0	2	2	0	1	0	0	0	1	1	1	0	0	0	0	0	0	0	0	0	0	0	0	0	0	0	1
Nggem	0	0	1	1	0	0	1	0	0	0	0	0	1	0	1	0	1	1	0	0	0	0	0	2	2	0	0	0	0	0	0	0	0	1	0	0	0	0	0	0	0	0	0	1	1	0	1	0	0
Korowai	0	0	1	1	0	1	1	1	0	0	0	0	1	0	0	0	1	0	0	0	0	0	0	2	1	0	0	0	0	0	0	0	1	1	1	0	0	0	0	0	0	0	0	1	1	0	1	0	1
Una	1	0	1	0	0	0	1	1	0	0	0	0	1	?	0	1	1	0	0	0	0	0	0	2	1	0	0	0	0	0	1	0	0	0	0	1	0	0	0	0	0	0	0	1	1	?	1	1	1
Telefol	1	1	1	0	0	0	1	0	0	0	1	0	1	0	0	1	1	0	0	0	0	0	1	2	3	0	1	0	0	1	0	0	1	1	1	1	1	0	0	0	0	0	0	1	1	1	0	0	0
Kewa	0	0	1	1	1	0	1	0	0	0	0	1	1	?	?	1	0	0	0	0	0	0	0	2	1	0	0	0	0	0	1	0	1	0	0	1	1	0	0	0	0	0	0	0	0	0	1	1	1
Kobon	1	0	1	0	1	1	0	1	0	0	0	1	0	1	1	0	1	1	0	0	1	0	1	2	2	0	1	0	0	0	1	0	1	0	0	1	0	0	0	0	0	0	0	0	0	0	1	0	0
Usan	0	0	1	1	0	0	1	0	0	0	0	1	1	0	0	0	1	0	0	0	0	0	0	2	2	0	1	0	0	0	0	0	1	1	0	1	1	0	0	0	0	0	0	0	0	0	1	0	0
Waskia	1	0	1	0	1	0	1	0	0	0	0	0	0	0	1	0	1	0	0	?	0	0	0	2	2	0	1	0	0	0	0	0	?	?	1	0	0	0	0	0	0	0	0	0	0	0	1	1	1
Tauya	0	0	1	0	0	0	0	0	0	0	0	0	0	0	1	0	1	0	0	0	0	0	0	2	1	0	0	1	0	0	0	1	0	1	0	1	0	0	0	0	0	0	0	0	0	0	1	0	0
Hua	0	0	1	0	0	0	1	0	0	0	0	0	0	1	1	1	0	1	0	0	0	0	0	3	1	0	1	0	0	0	1	0	1	1	1	1	1	0	0	0	1	0	0	0	0	1	1	0	1
Yagaria	0	0	1	0	0	0	1	0	0	0	0	0	1	?	?	1	1	0	0	0	0	0	0	3	1	0	1	0	0	0	1	0	1	0	1	1	?	0	0	0	?	0	0	0	0	?	1	0	1
Menya	0	0	1	1	0	0	0	1	0	0	0	1	0	?	?	?	1	1	0	1	0	0	1	2	2	0	0	0	0	1	1	0	1	0	1	1	0	0	0	1	0	0	0	1	1	0	1	1	0
Nabak	1	0	1	0	0	0	1	0	0	0	0	1	?	?	?	?	1	0	0	0	0	0	0	2	3	0	1	0	0	0	1	0	1	?	1	1	0	0	0	0	0	0	?	0	0	?	1	?	1
Selepet	1	0	1	0	1	1	1	0	0	0	0	0	0	0	1	0	1	0	0	0	0	0	0	2	2	0	1	0	0	0	1	0	1	?	1	1	0	0	0	0	0	0	1	1	1	0	1	1	0
Koiari	0	0	1	0	0	0	1	0	0	0	0	0	1	0	1	0	0	0	0	0	0	0	0	2	2	0	1	0	0	0	0	0	0	0	1	1	0	0	0	0	0	0	0	1	0	0	1	0	1
Korafe	0	0	1	0	0	1	1	1	0	0	1	0	1	1	1	0	0	0	0	0	0	0	0	2	2	0	1	1	0	0	1	0	1	1	1	0	0	0	0	0	0	0	0	0	0	1	1	1	1
Umanakaina	0	0	0	1	0	0	1	0	0	0	0	0	1	0	1	0	0	0	0	0	0	0	0	2	2	0	1	0	0	0	0	0	1	1	0	0	0	0	0	0	0	0	0	0	1	0	1	0	0
Bardi	1	1	0	0	1	0	0	1	1	0	1	0	0	0	1	0	1	?	?	0	0	0	0	3	3	1	1	0	1	0	0	0	0	0	0	0	0	0	0	0	0	0	0	0	0	0	1	0	0
Ngarinyin	1	1	0	0	1	0	0	1	1	0	?	0	0	0	1	0	1	1	0	0	0	0	0	3	3	?	1	1	0	1	0	0	0	0	1	0	0	0	0	0	0	0	1	0	0	1	1	1	0
Gooniyandi	1	1	0	0	1	0	0	1	1	0	1	0	0	1	1	0	1	1	1	0	0	0	0	3	3	1	1	0	0	0	0	0	0	1	0	0	0	0	0	0	0	0	1	1	0	0	0	1	0
Murrinhpatha	1	1	0	0	1	0	1	1	1	0	0	0	0	?	1	0	1	0	1	0	0	0	0	2	2	1	1	1	0	1	1	0	0	0	1	0	0	0	0	0	0	0	0	0	0	?	1	0	0
Tiwi	1	0	1	1	1	1	0	1	1	0	0	0	0	0	1	0	0	0	0	0	0	0	0	3	3	1	1	0	1	1	0	0	0	0	1	0	0	0	0	0	0	0	0	1	1	0	0	0	0
Mawng	1	1	1	0	1	1	0	1	1	0	0	0	0	1	1	0	1	0	1	1	0	1	0	1	1	1	1	1	0	1	1	0	0	0	0	0	0	0	0	0	0	1	0	1	1	0	1	1	1
Bininj_Gun-wok	1	1	0	0	1	0	0	1	1	1	0	0	0	1	1	0	1	0	1	0	0	0	0	3	3	1	1	1	1	1	1	0	0	0	1	0	0	0	0	0	0	0	0	0	0	0	1	1	1
Burarra	1	1	0	0	1	0	1	1	1	0	0	0	0	?	1	0	1	0	1	0	0	0	0	3	?	?	1	0	1	1	1	1	0	1	1	0	1	0	0	0	0	0	?	?	?	?	1	1	1
Garrwa	1	?	0	0	1	0	0	0	0	0	0	0	0	0	1	0	1	0	?	0	0	0	0	?	3	1	1	1	0	0	1	0	0	0	0	0	0	0	0	0	?	0	1	1	0	0	0	1	0
Kayardild	1	1	0	0	1	0	0	1	1	0	1	0	0	1	1	0	0	0	1	0	0	0	0	3	3	1	1	1	0	0	1	0	0	0	1	0	0	0	0	0	0	0	1	1	0	0	0	1	1
Warlpiri	1	1	0	0	1	0	0	1	1	0	0	0	0	0	1	0	0	0	0	0	0	0	0	3	3	1	1	1	0	0	1	0	0	0	1	0	1	0	0	0	0	0	1	1	0	1	1	1	0
Djambarrpuyngu	1	1	0	0	1	0	0	1	1	1	1	0	0	1	1	0	1	0	1	0	0	0	0	3	3	1	1	1	0	0	1	0	0	0	1	0	0	0	0	0	0	0	0	1	0	?	1	1	1
Ngarrinyeri	1	1	0	0	1	0	0	1	1	0	0	0	1	0	1	0	1	1	1	0	0	0	0	?	?	?	1	0	0	0	1	0	0	0	?	?	?	?	0	0	0	1	1	1	0	?	1	1	0
Kuuk_Thayorre	1	1	0	0	1	0	0	1	1	0	1	0	0	0	1	0	1	0	1	0	0	0	0	2	2	1	1	1	0	0	1	0	0	0	1	0	0	0	0	0	0	0	0	0	0	0	0	1	0
Kala_Lagaw_Ya	0	0	1	0	1	0	1	1	0	0	1	0	0	1	1	0	1	0	1	0	0	0	0	3	3	1	1	1	0	1	1	0	0	0	0	1	1	0	0	1	0	0	0	1	0	?	0	1	1
Uradhi	1	1	0	0	1	0	0	0	1	0	1	0	1	1	1	0	1	0	1	0	0	0	0	3	3	1	1	1	0	1	1	0	0	0	0	0	0	0	0	0	0	0	1	1	0	0	1	1	1
Bandjalang	1	1	0	0	1	0	0	1	0	0	1	0	0	1	1	0	1	0	0	0	0	0	0	3	3	1	1	0	0	1	0	0	0	0	1	0	1	0	0	0	0	0	0	1	1	?	1	1	1
[truncated: 111 more columns]
